# Supplementary material for: Evaluation of alcohol-free mouthwash for studies of the oral microbiome
Source: PLoS One. 2023 Apr 27;18(4):e0284956. doi: 10.1371/journal.pone.0284956 (PMC10138257; doi:10.1371/journal.pone.0284956)
Supplement: S1 Table — Differential abundance was tested using the Wilcoxon signed-rank test with Bonferroni correction for multiple testing. (XLSX) [file pone.0284956.s001.xlsx]

## Sheet: S1 Table. Relative abundances
		Ethanol-containing		Ethanol-free
Level	Taxa	Mean (SD)	Median (IQR)	Mean (SD)	Median (IQR)	Difference, mean (SD)	pval	adjpval
Phylum	D_0__Bacteria;D_1__Actinobacteria	0.0628 (0.0401)	0.0494 (0.0508)	0.0424 (0.0309)	0.0328 (0.0339)	0.0200 (0.0312)	< 0.0001	< 0.0001
	D_0__Bacteria;D_1__Bacteroidetes	0.198 (0.0915)	0.207 (0.126)	0.214 (0.0992)	0.222 (0.136)	-0.0155 (0.0623)	0.00206	0.0144
	D_0__Bacteria;D_1__Epsilonbacteraeota	0.00403 (0.00227)	0.00370 (0.00237)	0.00468 (0.00296)	0.00418 (0.00330)	-0.000729 (0.00195)	< 0.0001	0.000250
	D_0__Bacteria;D_1__Firmicutes	0.565 (0.0954)	0.547 (0.114)	0.568 (0.119)	0.549 (0.116)	-0.00234 (0.0661)	0.854	1.00
	D_0__Bacteria;D_1__Fusobacteria	0.0488 (0.0258)	0.0417 (0.0310)	0.0434 (0.0238)	0.0412 (0.0362)	0.00476 (0.0161)	< 0.0001	0.000188
	D_0__Bacteria;D_1__Patescibacteria	0.00292 (0.00510)	0.000700 (0.00294)	0.00220 (0.00350)	0.000668 (0.00262)	0.000818 (0.00350)	0.250	1.00
	D_0__Bacteria;D_1__Proteobacteria	0.116 (0.0618)	0.120 (0.0712)	0.123 (0.0601)	0.122 (0.0720)	-0.00699 (0.0431)	0.231	1.00
Class	D_0__Bacteria;D_1__Actinobacteria;D_2__Actinobacteria	0.0582 (0.0392)	0.0465 (0.0490)	0.0390 (0.0301)	0.0289 (0.0345)	0.0188 (0.0314)	< 0.0001	< 0.0001
	D_0__Bacteria;D_1__Actinobacteria;D_2__Coriobacteriia	0.00459 (0.00457)	0.00322 (0.00400)	0.00341 (0.00344)	0.00264 (0.00292)	0.00117 (0.00356)	< 0.0001	< 0.0001
	D_0__Bacteria;D_1__Bacteroidetes;D_2__Bacteroidia	0.198 (0.0915)	0.207 (0.126)	0.214 (0.0992)	0.222 (0.136)	-0.0155 (0.0623)	0.00206	0.0226
	D_0__Bacteria;D_1__Epsilonbacteraeota;D_2__Campylobacteria	0.00403 (0.00227)	0.00370 (0.00237)	0.00468 (0.00296)	0.00418 (0.00330)	-0.000729 (0.00195)	< 0.0001	0.000393
	D_0__Bacteria;D_1__Firmicutes;D_2__Bacilli	0.479 (0.113)	0.467 (0.133)	0.483 (0.139)	0.463 (0.151)	-0.00319 (0.0785)	0.883	1.00
	D_0__Bacteria;D_1__Firmicutes;D_2__Clostridia	0.0257 (0.0173)	0.0197 (0.0162)	0.0167 (0.00998)	0.0160 (0.0127)	0.00882 (0.0119)	< 0.0001	< 0.0001
	D_0__Bacteria;D_1__Firmicutes;D_2__Erysipelotrichia	0.00323 (0.00326)	0.00219 (0.00262)	0.00285 (0.00279)	0.00226 (0.00236)	0.000394 (0.00182)	0.170	1.00
	D_0__Bacteria;D_1__Firmicutes;D_2__Negativicutes	0.0570 (0.0267)	0.0547 (0.0322)	0.0654 (0.0372)	0.0568 (0.0392)	-0.00837 (0.0244)	0.00163	0.0180
	D_0__Bacteria;D_1__Fusobacteria;D_2__Fusobacteriia	0.0488 (0.0258)	0.0417 (0.0310)	0.0434 (0.0238)	0.0412 (0.0362)	0.00476 (0.0161)	< 0.0001	0.000295
	D_0__Bacteria;D_1__Patescibacteria;D_2__Gracilibacteria	0.00289 (0.00510)	0.000547 (0.00289)	0.00214 (0.00351)	0.000620 (0.00272)	0.000846 (0.00352)	0.0698	0.768
	D_0__Bacteria;D_1__Proteobacteria;D_2__Gammaproteobacteria	0.116 (0.0618)	0.120 (0.0713)	0.123 (0.0601)	0.122 (0.0720)	-0.00699 (0.0432)	0.230	1.00
Order	D_0__Bacteria;D_1__Actinobacteria;D_2__Actinobacteria;D_3__Actinomycetales	0.0101 (0.00966)	0.00757 (0.00844)	0.00739 (0.00604)	0.00544 (0.00676)	0.00279 (0.00680)	< 0.0001	0.00101
	D_0__Bacteria;D_1__Actinobacteria;D_2__Actinobacteria;D_3__Bifidobacteriales	0.00290 (0.0118)	0.000349 (0.00125)	0.00235 (0.00817)	0.000347 (0.00133)	0.000494 (0.00530)	0.372	1.00
	D_0__Bacteria;D_1__Actinobacteria;D_2__Actinobacteria;D_3__Micrococcales	0.0433 (0.0354)	0.0329 (0.0292)	0.0277 (0.0246)	0.0198 (0.0266)	0.0153 (0.0291)	< 0.0001	< 0.0001
	D_0__Bacteria;D_1__Actinobacteria;D_2__Coriobacteriia;D_3__Coriobacteriales	0.00459 (0.00457)	0.00322 (0.00400)	0.00341 (0.00344)	0.00264 (0.00292)	0.00117 (0.00356)	< 0.0001	< 0.0001
	D_0__Bacteria;D_1__Bacteroidetes;D_2__Bacteroidia;D_3__Bacteroidales	0.192 (0.0923)	0.193 (0.126)	0.208 (0.0999)	0.218 (0.139)	-0.0158 (0.0616)	0.00241	0.0386
	D_0__Bacteria;D_1__Bacteroidetes;D_2__Bacteroidia;D_3__Flavobacteriales	0.00536 (0.00645)	0.00363 (0.00444)	0.00506 (0.00410)	0.00354 (0.00503)	0.000297 (0.00546)	0.959	1.00
	D_0__Bacteria;D_1__Epsilonbacteraeota;D_2__Campylobacteria;D_3__Campylobacterales	0.00403 (0.00227)	0.00370 (0.00237)	0.00468 (0.00296)	0.00418 (0.00330)	-0.000729 (0.00195)	< 0.0001	0.000571
	D_0__Bacteria;D_1__Firmicutes;D_2__Bacilli;D_3__Bacillales	0.0612 (0.0250)	0.0596 (0.0310)	0.0624 (0.0449)	0.0522 (0.0280)	0.000238 (0.0321)	0.0674	1.00
	D_0__Bacteria;D_1__Firmicutes;D_2__Bacilli;D_3__Lactobacillales	0.418 (0.106)	0.405 (0.119)	0.421 (0.119)	0.397 (0.126)	-0.00343 (0.0653)	0.834	1.00
	D_0__Bacteria;D_1__Firmicutes;D_2__Clostridia;D_3__Clostridiales	0.0257 (0.0173)	0.0197 (0.0162)	0.0167 (0.00998)	0.0160 (0.0127)	0.00882 (0.0119)	< 0.0001	< 0.0001
	D_0__Bacteria;D_1__Firmicutes;D_2__Erysipelotrichia;D_3__Erysipelotrichales	0.00323 (0.00326)	0.00219 (0.00262)	0.00285 (0.00279)	0.00226 (0.00236)	0.000394 (0.00182)	0.170	1.00
	D_0__Bacteria;D_1__Firmicutes;D_2__Negativicutes;D_3__Selenomonadales	0.0570 (0.0267)	0.0547 (0.0322)	0.0654 (0.0372)	0.0568 (0.0392)	-0.00837 (0.0244)	0.00163	0.0261
	D_0__Bacteria;D_1__Fusobacteria;D_2__Fusobacteriia;D_3__Fusobacteriales	0.0488 (0.0258)	0.0417 (0.0310)	0.0434 (0.0238)	0.0412 (0.0362)	0.00476 (0.0161)	< 0.0001	0.000430
	D_0__Bacteria;D_1__Patescibacteria;D_2__Gracilibacteria;D_3__Absconditabacteriales (SR1)	0.00284 (0.00509)	0.000387 (0.00286)	0.00207 (0.00350)	0.000561 (0.00261)	0.000873 (0.00351)	0.0256	0.410
	D_0__Bacteria;D_1__Proteobacteria;D_2__Gammaproteobacteria;D_3__Betaproteobacteriales	0.0277 (0.0308)	0.0155 (0.0368)	0.0234 (0.0216)	0.0210 (0.0340)	0.00438 (0.0192)	0.0786	1.00
	D_0__Bacteria;D_1__Proteobacteria;D_2__Gammaproteobacteria;D_3__Pasteurellales	0.0877 (0.0460)	0.0774 (0.0589)	0.0993 (0.0497)	0.0964 (0.0499)	-0.0114 (0.0393)	0.00433	0.0693
Family	D_0__Bacteria;D_1__Actinobacteria;D_2__Actinobacteria;D_3__Actinomycetales;D_4__Actinomycetaceae	0.0101 (0.00966)	0.00757 (0.00844)	0.00739 (0.00604)	0.00544 (0.00676)	0.00279 (0.00680)	< 0.0001	0.00139
	D_0__Bacteria;D_1__Actinobacteria;D_2__Actinobacteria;D_3__Bifidobacteriales;D_4__Bifidobacteriaceae	0.00290 (0.0118)	0.000349 (0.00125)	0.00235 (0.00817)	0.000347 (0.00133)	0.000494 (0.00530)	0.372	1.00
	D_0__Bacteria;D_1__Actinobacteria;D_2__Actinobacteria;D_3__Micrococcales;D_4__Micrococcaceae	0.0433 (0.0354)	0.0329 (0.0292)	0.0277 (0.0246)	0.0198 (0.0266)	0.0153 (0.0291)	< 0.0001	< 0.0001
	D_0__Bacteria;D_1__Actinobacteria;D_2__Coriobacteriia;D_3__Coriobacteriales;D_4__Atopobiaceae	0.00453 (0.00452)	0.00322 (0.00393)	0.00338 (0.00337)	0.00264 (0.00290)	0.00115 (0.00350)	< 0.0001	< 0.0001
	D_0__Bacteria;D_1__Bacteroidetes;D_2__Bacteroidia;D_3__Bacteroidales;D_4__Porphyromonadaceae	0.00462 (0.00605)	0.00244 (0.00581)	0.00427 (0.00575)	0.00181 (0.00543)	0.000241 (0.00369)	0.0485	1.00
	D_0__Bacteria;D_1__Bacteroidetes;D_2__Bacteroidia;D_3__Bacteroidales;D_4__Prevotellaceae	0.186 (0.0918)	0.187 (0.128)	0.203 (0.0994)	0.214 (0.139)	-0.0159 (0.0618)	0.00235	0.0517
	D_0__Bacteria;D_1__Bacteroidetes;D_2__Bacteroidia;D_3__Flavobacteriales;D_4__Flavobacteriaceae	0.00273 (0.00260)	0.00184 (0.00308)	0.00262 (0.00235)	0.00186 (0.00327)	0.000100 (0.00224)	0.424	1.00
	D_0__Bacteria;D_1__Bacteroidetes;D_2__Bacteroidia;D_3__Flavobacteriales;D_4__Weeksellaceae	0.00263 (0.00522)	0.00161 (0.00168)	0.00244 (0.00262)	0.00161 (0.00196)	0.000196 (0.00502)	0.100	1.00
	D_0__Bacteria;D_1__Epsilonbacteraeota;D_2__Campylobacteria;D_3__Campylobacterales;D_4__Campylobacteraceae	0.00400 (0.00225)	0.00370 (0.00234)	0.00467 (0.00295)	0.00418 (0.00311)	-0.000738 (0.00195)	< 0.0001	0.000471
	D_0__Bacteria;D_1__Firmicutes;D_2__Bacilli;D_3__Bacillales;D_4__Family XI	0.0612 (0.0249)	0.0596 (0.0310)	0.0624 (0.0449)	0.0521 (0.0281)	0.000172 (0.0321)	0.0726	1.00
	D_0__Bacteria;D_1__Firmicutes;D_2__Bacilli;D_3__Lactobacillales;D_4__Carnobacteriaceae	0.0175 (0.00979)	0.0152 (0.0137)	0.0172 (0.0118)	0.0147 (0.0155)	0.000649 (0.00859)	0.134	1.00
	D_0__Bacteria;D_1__Firmicutes;D_2__Bacilli;D_3__Lactobacillales;D_4__Streptococcaceae	0.398 (0.107)	0.379 (0.123)	0.402 (0.118)	0.370 (0.136)	-0.00416 (0.0645)	0.819	1.00
	D_0__Bacteria;D_1__Firmicutes;D_2__Clostridia;D_3__Clostridiales;D_4__Family XI	0.00410 (0.00452)	0.00243 (0.00489)	0.00191 (0.00209)	0.00130 (0.00213)	0.00214 (0.00306)	< 0.0001	< 0.0001
	D_0__Bacteria;D_1__Firmicutes;D_2__Clostridia;D_3__Clostridiales;D_4__Family XIII	0.00477 (0.00401)	0.00358 (0.00334)	0.00298 (0.00277)	0.00240 (0.00265)	0.00177 (0.00311)	< 0.0001	< 0.0001
	D_0__Bacteria;D_1__Firmicutes;D_2__Clostridia;D_3__Clostridiales;D_4__Lachnospiraceae	0.0105 (0.00732)	0.00847 (0.00868)	0.00718 (0.00457)	0.00620 (0.00571)	0.00332 (0.00558)	< 0.0001	< 0.0001
	D_0__Bacteria;D_1__Firmicutes;D_2__Clostridia;D_3__Clostridiales;D_4__Peptostreptococcaceae	0.00427 (0.00525)	0.00258 (0.00542)	0.00259 (0.00267)	0.00205 (0.00316)	0.00165 (0.00360)	< 0.0001	< 0.0001
	D_0__Bacteria;D_1__Firmicutes;D_2__Erysipelotrichia;D_3__Erysipelotrichales;D_4__Erysipelotrichaceae	0.00323 (0.00326)	0.00219 (0.00262)	0.00285 (0.00279)	0.00226 (0.00236)	0.000394 (0.00182)	0.170	1.00
	D_0__Bacteria;D_1__Firmicutes;D_2__Negativicutes;D_3__Selenomonadales;D_4__Veillonellaceae	0.0570 (0.0267)	0.0547 (0.0322)	0.0654 (0.0372)	0.0568 (0.0392)	-0.00837 (0.0244)	0.00163	0.0360
	D_0__Bacteria;D_1__Fusobacteria;D_2__Fusobacteriia;D_3__Fusobacteriales;D_4__Fusobacteriaceae	0.0360 (0.0201)	0.0314 (0.0294)	0.0325 (0.0200)	0.0289 (0.0251)	0.00292 (0.0145)	0.00159	0.0349
	D_0__Bacteria;D_1__Fusobacteria;D_2__Fusobacteriia;D_3__Fusobacteriales;D_4__Leptotrichiaceae	0.0128 (0.0109)	0.00840 (0.0118)	0.0109 (0.00966)	0.00847 (0.0119)	0.00183 (0.00622)	0.000774	0.0170
	D_0__Bacteria;D_1__Proteobacteria;D_2__Gammaproteobacteria;D_3__Betaproteobacteriales;D_4__Neisseriaceae	0.0269 (0.0305)	0.0140 (0.0356)	0.0229 (0.0214)	0.0202 (0.0339)	0.00400 (0.0191)	0.153	1.00
	D_0__Bacteria;D_1__Proteobacteria;D_2__Gammaproteobacteria;D_3__Pasteurellales;D_4__Pasteurellaceae	0.0877 (0.0460)	0.0774 (0.0589)	0.0993 (0.0497)	0.0964 (0.0499)	-0.0114 (0.0393)	0.00433	0.0953
Genus	D_0__Bacteria;D_1__Actinobacteria;D_2__Actinobacteria;D_3__Actinomycetales;D_4__Actinomycetaceae;D_5__Actinomyces	0.00997 (0.00966)	0.00757 (0.00859)	0.00728 (0.00606)	0.00541 (0.00679)	0.00273 (0.00679)	< 0.0001	0.00261
	D_0__Bacteria;D_1__Actinobacteria;D_2__Actinobacteria;D_3__Bifidobacteriales;D_4__Bifidobacteriaceae;D_5__Scardovia	0.00230 (0.0119)	0.000 (0.000322)	0.00175 (0.00785)	0.0000399 (0.000539)	0.000498 (0.00460)	0.0598	1.00
	D_0__Bacteria;D_1__Actinobacteria;D_2__Actinobacteria;D_3__Micrococcales;D_4__Micrococcaceae;D_5__Rothia	0.0433 (0.0354)	0.0329 (0.0292)	0.0277 (0.0246)	0.0198 (0.0266)	0.0153 (0.0291)	< 0.0001	< 0.0001
	D_0__Bacteria;D_1__Actinobacteria;D_2__Coriobacteriia;D_3__Coriobacteriales;D_4__Atopobiaceae;D_5__Atopobium	0.00452 (0.00452)	0.00322 (0.00393)	0.00331 (0.00319)	0.00264 (0.00290)	0.00121 (0.00333)	< 0.0001	< 0.0001
	D_0__Bacteria;D_1__Bacteroidetes;D_2__Bacteroidia;D_3__Bacteroidales;D_4__Porphyromonadaceae;D_5__Porphyromonas	0.00462 (0.00605)	0.00244 (0.00581)	0.00427 (0.00575)	0.00181 (0.00543)	0.000241 (0.00369)	0.0485	1.00
	D_0__Bacteria;D_1__Bacteroidetes;D_2__Bacteroidia;D_3__Bacteroidales;D_4__Prevotellaceae;D_5__Alloprevotella	0.0240 (0.0230)	0.0142 (0.0271)	0.0251 (0.0346)	0.0160 (0.0189)	-0.00127 (0.0234)	0.485	1.00
	D_0__Bacteria;D_1__Bacteroidetes;D_2__Bacteroidia;D_3__Bacteroidales;D_4__Prevotellaceae;D_5__Prevotella	0.0328 (0.0200)	0.0313 (0.0244)	0.0377 (0.0230)	0.0392 (0.0329)	-0.00445 (0.0139)	0.000643	0.0193
	D_0__Bacteria;D_1__Bacteroidetes;D_2__Bacteroidia;D_3__Bacteroidales;D_4__Prevotellaceae;D_5__Prevotella 6	0.00876 (0.00897)	0.00471 (0.00930)	0.0106 (0.0106)	0.00698 (0.0129)	-0.00178 (0.00485)	0.000259	0.00778
	D_0__Bacteria;D_1__Bacteroidetes;D_2__Bacteroidia;D_3__Bacteroidales;D_4__Prevotellaceae;D_5__Prevotella 7	0.120 (0.0739)	0.119 (0.112)	0.128 (0.0809)	0.117 (0.120)	-0.00807 (0.0496)	0.0708	1.00
	D_0__Bacteria;D_1__Bacteroidetes;D_2__Bacteroidia;D_3__Flavobacteriales;D_4__Flavobacteriaceae;D_5__Capnocytophaga	0.00273 (0.00260)	0.00184 (0.00308)	0.00262 (0.00235)	0.00186 (0.00327)	0.000100 (0.00224)	0.424	1.00
	D_0__Bacteria;D_1__Bacteroidetes;D_2__Bacteroidia;D_3__Flavobacteriales;D_4__Weeksellaceae;D_5__Bergeyella	0.00263 (0.00522)	0.00161 (0.00168)	0.00244 (0.00261)	0.00161 (0.00196)	0.000204 (0.00501)	0.105	1.00
	D_0__Bacteria;D_1__Epsilonbacteraeota;D_2__Campylobacteria;D_3__Campylobacterales;D_4__Campylobacteraceae;D_5__Campylobacter	0.00400 (0.00225)	0.00370 (0.00234)	0.00467 (0.00295)	0.00418 (0.00311)	-0.000738 (0.00195)	< 0.0001	0.000643
	D_0__Bacteria;D_1__Firmicutes;D_2__Bacilli;D_3__Bacillales;D_4__Family XI;D_5__Gemella	0.0612 (0.0249)	0.0596 (0.0310)	0.0624 (0.0449)	0.0521 (0.0281)	0.000172 (0.0321)	0.0726	1.00
	D_0__Bacteria;D_1__Firmicutes;D_2__Bacilli;D_3__Lactobacillales;D_4__Carnobacteriaceae;D_5__Granulicatella	0.0175 (0.00979)	0.0152 (0.0137)	0.0172 (0.0118)	0.0147 (0.0155)	0.000650 (0.00859)	0.134	1.00
	D_0__Bacteria;D_1__Firmicutes;D_2__Bacilli;D_3__Lactobacillales;D_4__Streptococcaceae;D_5__Streptococcus	0.398 (0.107)	0.379 (0.123)	0.402 (0.118)	0.370 (0.136)	-0.00415 (0.0645)	0.819	1.00
	D_0__Bacteria;D_1__Firmicutes;D_2__Clostridia;D_3__Clostridiales;D_4__Family XI;D_5__Parvimonas	0.00400 (0.00450)	0.00239 (0.00460)	0.00185 (0.00209)	0.00113 (0.00203)	0.00210 (0.00301)	< 0.0001	< 0.0001
	D_0__Bacteria;D_1__Firmicutes;D_2__Clostridia;D_3__Clostridiales;D_4__Lachnospiraceae;D_5__Lachnoanaerobaculum	0.00282 (0.00216)	0.00236 (0.00185)	0.00188 (0.00126)	0.00169 (0.00162)	0.000949 (0.00159)	< 0.0001	< 0.0001
	D_0__Bacteria;D_1__Firmicutes;D_2__Clostridia;D_3__Clostridiales;D_4__Lachnospiraceae;D_5__Oribacterium	0.00265 (0.00226)	0.00192 (0.00203)	0.00205 (0.00164)	0.00154 (0.00175)	0.000578 (0.00192)	0.00136	0.0407
	D_0__Bacteria;D_1__Firmicutes;D_2__Clostridia;D_3__Clostridiales;D_4__Lachnospiraceae;D_5__Stomatobaculum	0.00336 (0.00435)	0.00204 (0.00309)	0.00151 (0.00193)	0.000930 (0.00133)	0.00186 (0.00303)	< 0.0001	< 0.0001
	D_0__Bacteria;D_1__Firmicutes;D_2__Clostridia;D_3__Clostridiales;D_4__Peptostreptococcaceae;D_5__Peptostreptococcus	0.00387 (0.00504)	0.00199 (0.00498)	0.00228 (0.00254)	0.00141 (0.00279)	0.00158 (0.00360)	< 0.0001	< 0.0001
	D_0__Bacteria;D_1__Firmicutes;D_2__Erysipelotrichia;D_3__Erysipelotrichales;D_4__Erysipelotrichaceae;D_5__Solobacterium	0.00304 (0.00326)	0.00199 (0.00218)	0.00270 (0.00281)	0.00206 (0.00222)	0.000350 (0.00177)	0.228	1.00
	D_0__Bacteria;D_1__Firmicutes;D_2__Negativicutes;D_3__Selenomonadales;D_4__Veillonellaceae;D_5__Megasphaera	0.00284 (0.00359)	0.00156 (0.00313)	0.00327 (0.00434)	0.00191 (0.00327)	-0.000411 (0.00177)	0.0818	1.00
	D_0__Bacteria;D_1__Firmicutes;D_2__Negativicutes;D_3__Selenomonadales;D_4__Veillonellaceae;D_5__Veillonella	0.0506 (0.0236)	0.0487 (0.0307)	0.0584 (0.0343)	0.0511 (0.0404)	-0.00777 (0.0236)	0.00278	0.0833
	D_0__Bacteria;D_1__Fusobacteria;D_2__Fusobacteriia;D_3__Fusobacteriales;D_4__Fusobacteriaceae;D_5__Fusobacterium	0.0360 (0.0201)	0.0314 (0.0294)	0.0325 (0.0200)	0.0289 (0.0251)	0.00292 (0.0145)	0.00159	0.0476
	D_0__Bacteria;D_1__Fusobacteria;D_2__Fusobacteriia;D_3__Fusobacteriales;D_4__Leptotrichiaceae;D_5__Leptotrichia	0.0127 (0.0108)	0.00840 (0.0118)	0.0108 (0.00964)	0.00847 (0.0118)	0.00186 (0.00619)	0.000392	0.0118
	D_0__Bacteria;D_1__Proteobacteria;D_2__Gammaproteobacteria;D_3__Betaproteobacteriales;D_4__Neisseriaceae;D_5__Neisseria	0.0250 (0.0295)	0.0123 (0.0336)	0.0215 (0.0207)	0.0184 (0.0321)	0.00365 (0.0185)	0.307	1.00
	D_0__Bacteria;D_1__Proteobacteria;D_2__Gammaproteobacteria;D_3__Pasteurellales;D_4__Pasteurellaceae;__	0.00256 (0.00700)	0.000 (0.000582)	0.00291 (0.00792)	0.000 (0.000657)	-0.000432 (0.00444)	0.201	1.00
	D_0__Bacteria;D_1__Proteobacteria;D_2__Gammaproteobacteria;D_3__Pasteurellales;D_4__Pasteurellaceae;D_5__Actinobacillus	0.00512 (0.00979)	0.00162 (0.00459)	0.00616 (0.0121)	0.00156 (0.00626)	-0.00111 (0.00446)	0.214	1.00
	D_0__Bacteria;D_1__Proteobacteria;D_2__Gammaproteobacteria;D_3__Pasteurellales;D_4__Pasteurellaceae;D_5__Aggregatibacter	0.00442 (0.00493)	0.00307 (0.00506)	0.00664 (0.00903)	0.00335 (0.00731)	-0.00225 (0.00752)	0.0154	0.461
	D_0__Bacteria;D_1__Proteobacteria;D_2__Gammaproteobacteria;D_3__Pasteurellales;D_4__Pasteurellaceae;D_5__Haemophilus	0.0756 (0.0437)	0.0633 (0.0537)	0.0836 (0.0455)	0.0802 (0.0534)	-0.00763 (0.0341)	0.0263	0.788
P, nominal p-value obtained from the Wilcoxon signed-rank test; adjusted P, Bonferroni-corrected p-value.
